# Supplementary material
Source: publisher site journal article supplement (https://www.dovepress.com/article/308308)
Supplement: Supplementary file 1 [file get_supplementary_file.php]

**Supplementary materials**

**Table S1 Sequence types for the *K.peneumoniae* isolates**

| **Strains** | **Alleles** | | | | | | | **STs** |
| --- | --- | --- | --- | --- | --- | --- | --- | --- |
|  | *gapA* | *infB* | *mdh* | *pgi* | *pho* | *rpoB* | *tonB* |
| *K.peneumoniae-*faeces | 3 | 3 | 1 | 1 | 1 | 1 | 4 | 11 |
| *K.peneumoniae-*incision | 3 | 3 | 1 | 1 | 1 | 1 | 4 | 11 |
| *K.peneumoniae-*urine | 3 | 3 | 1 | 1 | 1 | 1 | 4 | 11 |

STs, Sequence types.

**Figure S1 XbaI pulsed-field gel electrophoresis (PFGE) patterns of three *K.peneumoniae* strains.**Lane1:*K.peneumoniae* 3004-2 lane2:*K.peneumoniae* 3007-2 lane3:*K.peneumoniae* 3046-2 M:H9812


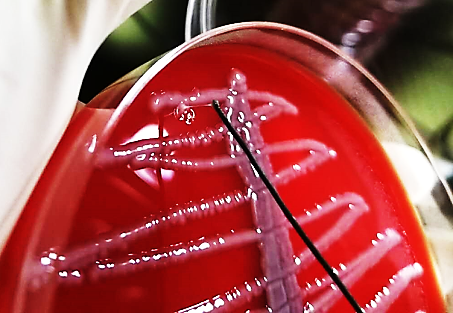


**Figure S2** Hypermucoviscous phenotype of the CRKP isolate by string test. The CRKP isolate was cultured on the blood agar plate, and inoculation needle was able to generate a viscous string > 5 mm in length by stretching colonies, indicating the hypermucoviscous phenotype.

**Table S2 Presence of virulence genes in *K.peneumoniae*.**

| **Strain** | **virulence genes** | | | | |
| --- | --- | --- | --- | --- | --- |
| *rmpA2* | *ybtS* | *iucA* | *rmpA* | *peg344* |
| *K.peneumoniae* | P | P | P | P | P |
| *K.peneumoniae-*positive control | P | P | P | P | N |
| *K.peneumoniae*-negative control | N | N | N | N | N |

P, positive; N; negative.

**Figure S****3 The PCR amplification for the *rmpA2*, *ybtS*, *iucA*, *rmpA*, and *peg344* genes in the *K.peneumoniae* 3004-2.** M. DL2000 marker; 1. *K.peneumoniae* 3004-2; 2. *K.peneumoniae-*124; 3.*K.peneumoniae*-2; B. The blank control.

**Table S3 Antibiotic susceptibility testing of *Klebsiella pneumoniae***

| **NO.** | **Antibiotic** | **KB**  **(mm)** | **MIC**  **(μg/ml)** | **Sensitivity** |
| --- | --- | --- | --- | --- |
| 1 | Tigecycline |  | 1 | sensitive |
| 2 | Biapenem | 6 |  | resistant |
| 3 | Cefoperazone / Sulbactam | 6 |  | resistant |
| 4 | Cefuroxime | 6 |  | resistant |
| 5 | Ampicillin |  | >16 | resistant |
| 6 | Amoxicillin / Clavulanic acid |  | >16/8 | resistant |
| 7 | Amikacin |  | >32 | resistant |
| 8 | Aztreonam |  | >16 | resistant |
| 9 | Ceftazidine |  | >16 | resistant |
| 10 | Ciprofloxacin |  | >2 | resistant |
| 11 | Polymyxin |  | <=0.5 | sensitive |
| 12 | Cefotaxime |  | >32 | resistant |
| 13 | Cefazolin |  | >16 | resistant |
| 14 | Cefepime |  | >16 | resistant |
| 15 | Gentamicin |  | >8 | resistant |
| 16 | Imipenem |  | >8 | resistant |
| 17 | Levofloxacin |  | >8 | resistant |
| 18 | Meropenem |  | >8 | resistant |
| 19 | Piperacillin |  | >64 | resistant |
| 20 | Ampicillin / Sulbactam |  | >16/8 | resistant |
| 21 | Compound Sulfaguanidine |  | >2/38 | resistant |
| 22 | Tetracycline |  | >8 | resistant |
| 23 | Piperacillin / Tazobactam |  | >64/4 | resistant |
| 24 | Fosfomycin |  | 64 | sensitive |

The susceptibility testing for polymyxin and tigecycline were performed according to European Committee on Antimicrobial Susceptibility Testing (EUCAST). Other antimicrobial susceptibility results were interpreted using the Clinical and Laboratory Standards (CLSI) criteria.

**Table S4 Protocol of donor screening.**

| **Screening** | **Inclusion / exclusion criteria** |
| --- | --- |
| **Questionnaire screening** | **Inclusion criteria:** |
|  | (1) Willing to finish questionnaire screening and sign informed consent; |
|  | (2) Age range 18 to 24 years old; |
|  | (3 Normal body mass index (18-24) and regular bowel habits; |
|  | **Exclusion criteria:** |
|  | (1) History of drug |
|  | Received antibiotics, probiotics of pharmaceutical grade, laxative within 3 months. |
|  | (2) History of diseases |
|  | History of all known infection diseases, gastrointestinal diseases (IBD, IBS, chronic diarrhea, constipation and others), allergy, gastrointestinal surgery, autoimmune diseases, malignant tumor, mental illness, diabetes, hypertension, hyperlipidemia, and other diseases or conditions associated with changes in gut microbiota. |
|  | (3) Family history |
|  | First degree relative with gastrointestinal diseases (IBD, IBS, chronic diarrhea, constipation, carcinoma), diabetes, metabolic syndrome, mental diseases, genetic diseases; |
|  | (4) Sex behaviors |
|  | With sexual activity during past 6 months. |
|  |  |
| **Face to face interview** | **Inclusion criteria:** |
|  | (1) Willing to donate feces and cooperate with management; |
|  | (2) Normal sleep quality, diet habits, physical exercise. |
|  | **Exclusion criteria:** |
|  | (1) Persons judged to have questionable integrity; |
|  | (2) Any anxiety, depression and other abnormal psychology situation; |
|  | (3) Living in geographic extremes such as regions of high altitude, high temperature, cold, high humidity, severely polluted areas; |
|  | (4) Exposure to epidemic area and still in the window stage; |
|  | (5) Smoking or drug/alcohol abuse. |
|  |  |
| **Laboratory examination** | **Inclusion criteria:** |
|  | Normal blood cell count, CRP, ESR, immunoglobulin (IgA, IgM, IgG, IgE), serum lipid, FPG and other biochemical results; |
|  | **Exclusion criteria:** |
|  | (1) Blood tests: Positive finding of HIV-1 or HIV-2 (anti-HIV), HBV (HBsAg + anti-HBc IgM), HCV (anti-HCV), Syphilis (Ig), TORCH (Cytomegalovirus IgM, Rubella virus IgM, Herpes simplex virus types 1 and 2 IgM, Toxoplasma gondii IgM), HAV (IgM + IgG), HEV (IgM + IgG), EBV (IgM + IgG); |
|  | (2) Stool tests: Positive finding of *Clostridium difficile* toxin A/B, Shigella spp., *Salmonella* spp., *Campylobacter* spp., *Escherichia coli* O157 H7, Shiga-producing *Escherichia coli,* *Yersinia enterocolitis*; MDROs: Vancomycin-resistant *Enterococci* spp., Carbapenem-resistant *Enterobacteriaceae*, ESBL-producing *E. coli*, Methicillin-resistant *Staphylococcus aureus*; *Aeromonas* spp., *Plesiomonas* spp., *Yesinia* spp., *Vibrio* spp.; Virus: Rotavirus, Adenovirus, HEV, Polio virus; Parasites: Cryptosporidium, Entamoeba histolytica, Giardia lamblia, , Microspore, Isosporiasis; Fecal occult blood test. |
